# Supplementary material for: Unequal Behaviour between Hydrolysable Functions of Nirmatrelvir under Stress Conditions: Structural and Theoretical Approaches in Support of Preformulation Studies
Source: MDPI journal article supplement (doi:10.3390/pharmaceutics14081720), 2022-08-17
Supplement: s1 [file s1]

Supplementary material to :

# **Unequal behavior among hydrolyzable functions of nirmatrelvir under stress conditions in preformulation studies: structural and theoretical studies**

**Philippe-Henri Secretan<sup>1,\*</sup>, Maxime Annereau<sup>1,2</sup>, Willy Kini Matondo<sup>3</sup>, Bastien Prost<sup>4</sup>, Jade Prudhomme<sup>1</sup>, Lina Bournane<sup>1</sup>, Muriel Paul<sup>3,5</sup>, Najet Yagoubi<sup>1</sup>, Hassane Sadou-Yayé<sup>1,6</sup>, Bernard Do<sup>1,3</sup>**

1 Matériaux et santé, Université Paris-Saclay, 92296, Châtenay-Malabry, France

2 Clinical Pharmacy Department, Gustave Roussy Cancer Campus, 114 rue Edouard Vaillant, 94800 Villejuif, France

3 Department of Pharmacy, Henri Mondor Hospital, AP-HP, 94010 Créteil, France

4 UMS-IPSIT-SAMM, Ingénierie et Plateformes au Service de l'Innovation Thérapeutique, Université Paris-Saclay, 92296, Châtenay-Malabry, France

5 EpidermE, Université Paris Est Creteil, 94010 Creteil, France

6 Department of Pharmacy, Pitié-Salpêtrière hospital, AP-HP, 75013 Paris, France

# Table of contents

|                                                                                                                                                                                                                                             |   |
|---------------------------------------------------------------------------------------------------------------------------------------------------------------------------------------------------------------------------------------------|---|
| Figure S1: (a) LC-UV chromatograms of nirmatrelvir: standard solution (black), after 3 hours at pH=13 +/- 0.2 (blue), after one week at pH=1 +/- 0.2 and at 40°C(pink). (b) detailed results of the chromatograms exposed in inset (a)..... | 3 |
| Figure S2: LC-HRMS <sup>2</sup> mass spectrum of protonated nirmatrelvir.....                                                                                                                                                               | 3 |
| Figure S3: LC-HRMS <sup>2</sup> mass spectrum of protonated DP <sub>517</sub> .....                                                                                                                                                         | 4 |
| Figure S4: LC-HRMS <sup>3</sup> mass spectrum of the ion of mass to charge ratio 501 obtained after fragmentation of protonated DP <sub>517</sub> .....                                                                                     | 4 |
| Figure S5: LC-HRMS <sup>2</sup> mass spectrum of protonated DP <sub>403</sub> .....                                                                                                                                                         | 5 |
| Figure S6: LC-HRMS <sup>2</sup> mass spectrum of protonated DP <sub>421</sub> .....                                                                                                                                                         | 5 |

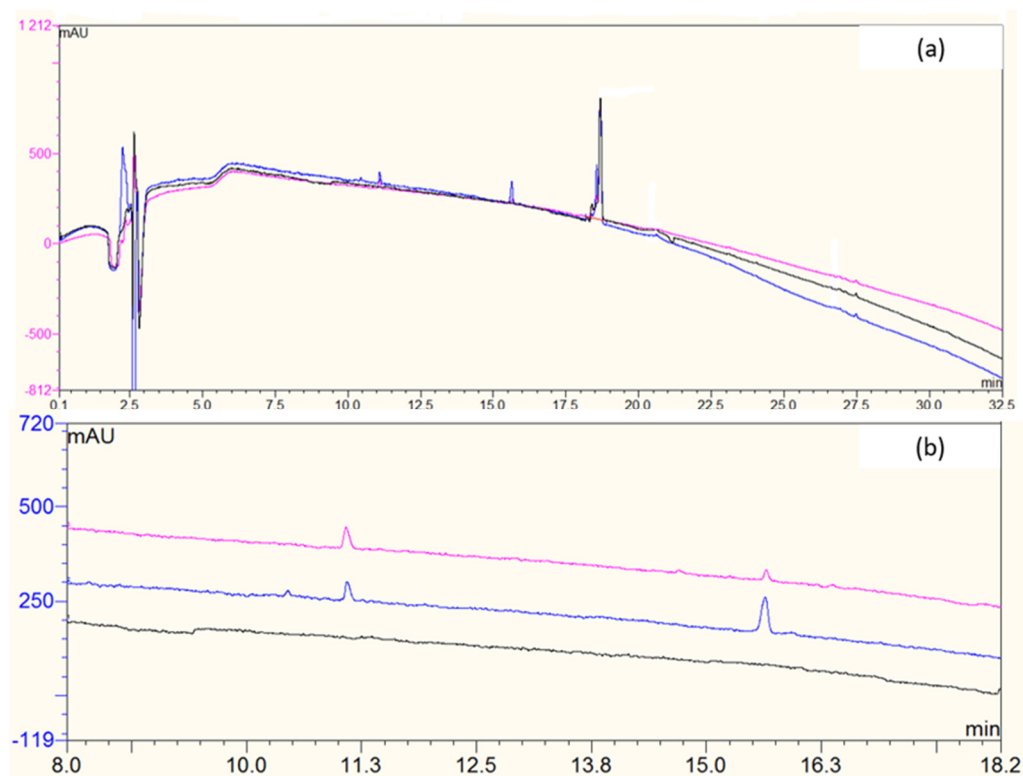

Figure S1: (a) LC-UV chromatograms of nirmatrelvir: standard solution (black), after 3 hours at pH=13 +/- 0.2 (blue), after one week at pH=1 +/- 0.2 and at 40°C (pink). (b) detailed results of the chromatograms exposed in inset (a).

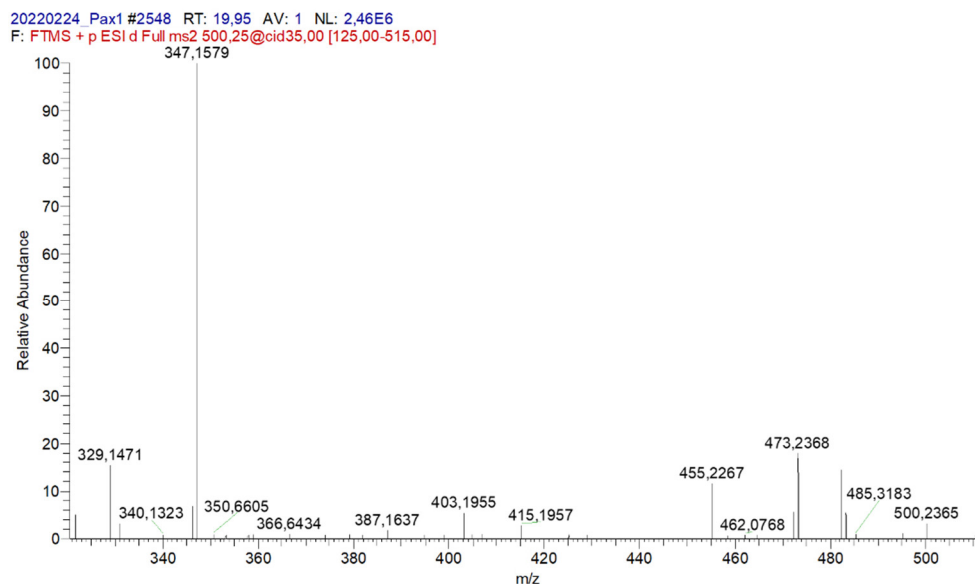

Figure S2: LC-HRMS<sup>2</sup> mass spectrum of protonated nirmatrelvir.

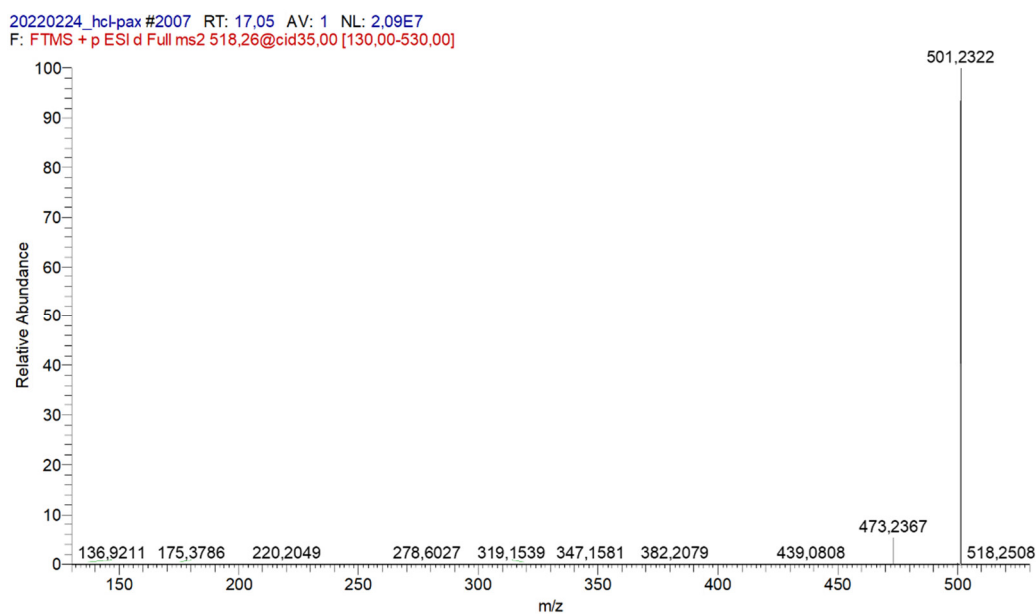

Figure S3: LC-HRMS<sup>2</sup> mass spectrum of protonated DP<sub>517</sub>.

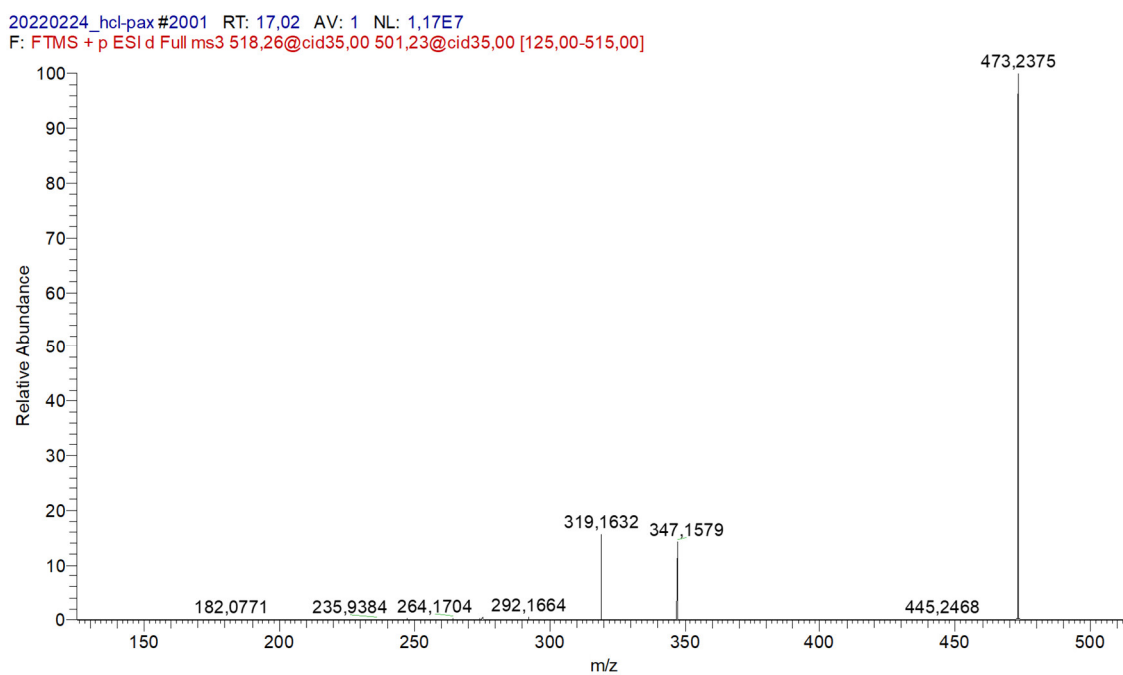

Figure S4: LC-HRMS<sup>3</sup> mass spectrum of the ion of mass to charge ratio 501 obtained after fragmentation of protonated DP<sub>517</sub>.

20220224\_hcl-pa2 #1347 RT: 11.49 AV: 1 NL: 5.47E6  
F: FTMS + p ESI d Full ms2 404,26@cid35,00 [100,00-415,00]

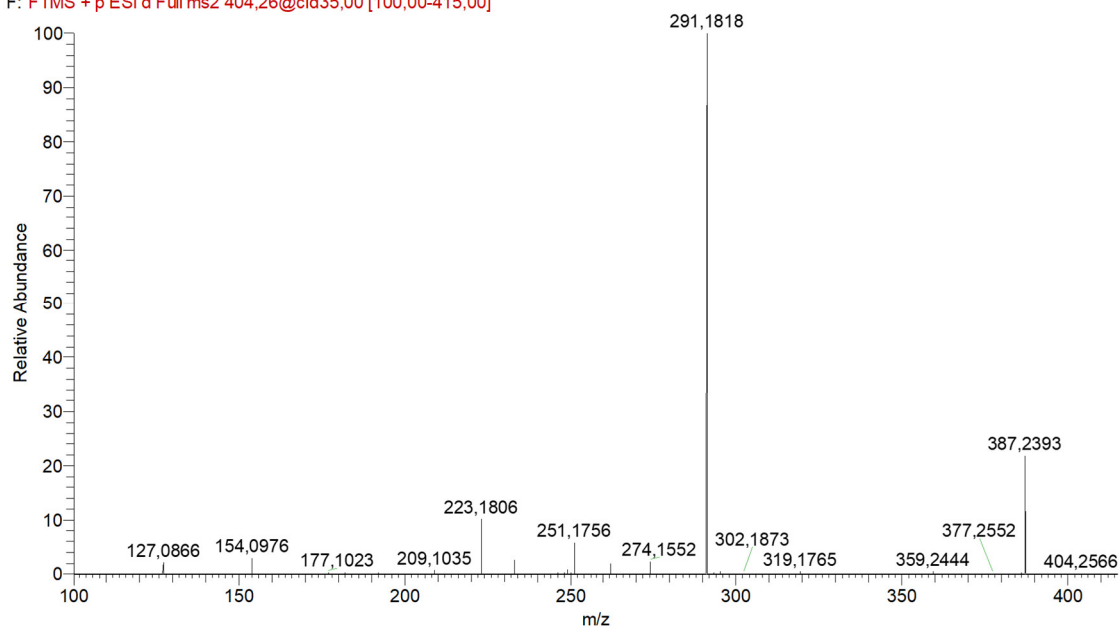

Figure S5: LC-HRMS<sup>2</sup> mass spectrum of protonated DP<sub>403</sub>.

20220224\_naoh-pax #1062 RT: 8.74 AV: 1 NL: 7.37E5  
F: FTMS + p ESI d Full ms2 422,27@cid35,00 [105,00-435,00]

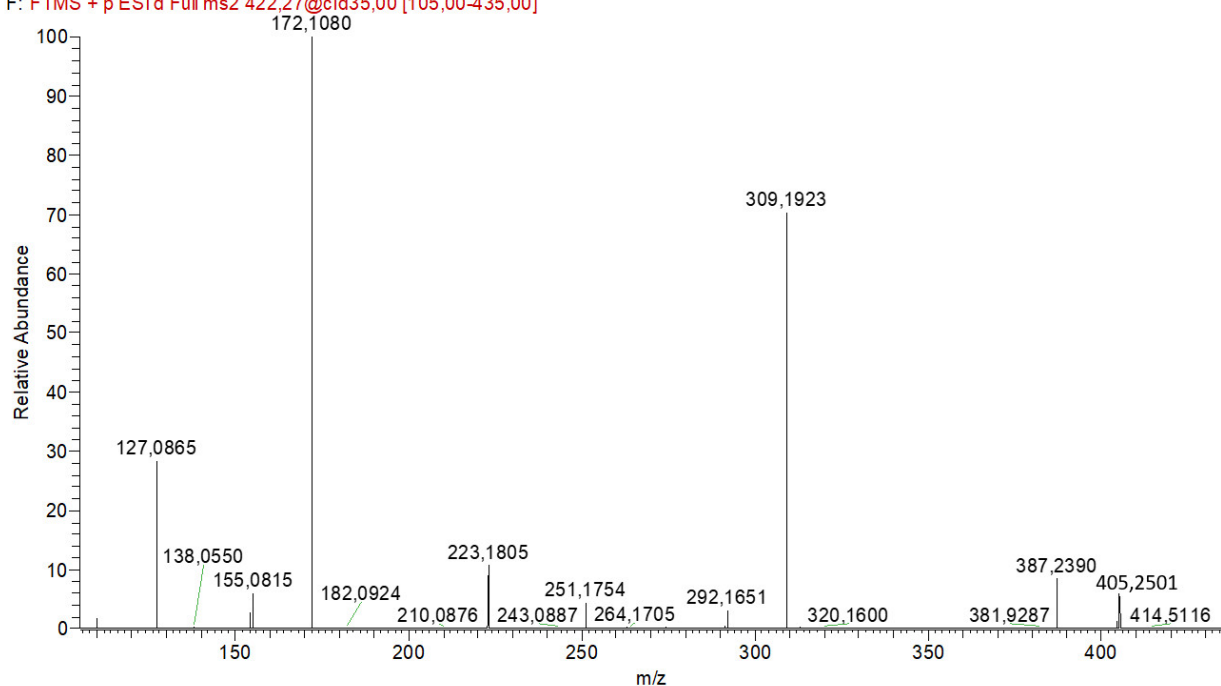

Figure S6: LC-HRMS<sup>2</sup> mass spectrum of protonated DP<sub>421</sub>.
